1 **A WD40 repeat-like protein pathway connects F-BOX STRESS INDUCED (FBS) proteins**  
2 **to the NIGT1.1 transcriptional repressor in Arabidopsis**  
3  
4

5 **Edgar Sepulveda-Garcia<sup>1,2</sup>, Elena C Fulton<sup>3†</sup>, Emily V Parlan<sup>3†</sup>, Ashley A Brauning<sup>3</sup>, Lily**  
6 **E O'Connor<sup>3</sup>, Anneke A Fleming<sup>3</sup>, Amy J Replogle<sup>3</sup>, Mario Rocha-Sosa<sup>2</sup>, Joshua M**  
7 **Gendron<sup>4</sup>, Bryan Thines<sup>3\*</sup>**  
8  
9

10 1 Instituto de Biotecnología, Universidad del Papaloapan, Tuxtepec 68301, Mexico  
11

12 2 Departamento de Biología Molecular de Plantas, Instituto de Biotecnología, Universidad  
13 Nacional Autónoma de México, Cuernavaca, Mor, 62250, Mexico  
14

15 3 Biology Department, University of Puget Sound, Tacoma, WA 98416, USA  
16

17 4 Department of Molecular, Cellular, and Developmental Biology, Yale University, New  
18 Haven, Connecticut 06511, USA  
19

20 † These authors have contributed equally to this work  
21  
22

23 **\* Correspondence:**

24 Bryan Thines

25 [bthines@pugetsound.edu](mailto:bthines@pugetsound.edu)  
26  
27

28 **Keywords: F-box protein, SCF complex, stress response, transcription regulation, WD40**  
29 **repeat-like protein**  
30  
31  
32  
33  
34  
35  
36  
37  
38  
39  
40  
41  
42  
43  
44  
45  
46

47 **ABSTRACT**

48

49 SCF-type E3 ubiquitin ligases use F-box (FBX) proteins as interchangeable substrate adaptors to  
50 recruit protein targets for ubiquitylation. FBX proteins almost universally have structure with  
51 two domains. A conserved N-terminal F-box domain interacts with a SKP protein and connects  
52 the FBX protein to the core SCF complex, while a C-terminal domain interacts with the protein  
53 target and facilitates recruitment. The F-BOX STRESS INDUCED (FBS) subfamily of four  
54 plant FBX proteins has atypical domain structure, however, with a centrally located F-box  
55 domain and additional conserved regions at both the N- and C-termini. FBS proteins have been  
56 linked to environmental stress networks, but no ubiquitylation target(s) or exact biological  
57 function has been established for this subfamily. We have identified two WD40 repeat-like  
58 proteins in Arabidopsis that are highly conserved in plants and interact with FBS proteins, which  
59 we have named FBS INTERACTING PROTEINs (FBIPs). FBIPs interact exclusively with the  
60 N-terminus of FBS proteins, and this interaction occurs in the nucleus. FBS1 destabilizes FBIP1,  
61 consistent with FBIPs being ubiquitylation targets of SCF<sup>FBS</sup> complexes. Furthermore, we found  
62 that FBIP1 interacts with NIGT1.1, a GARP-type transcriptional repressor that regulates nitrate  
63 and phosphate starvation signaling and responses. Collectively, these interactions between FBS,  
64 FBIP, and NIGT1.1 proteins delineate a previously unrecognized SCF-connected transcription  
65 regulation module that works in the context of phosphate and nitrate starvation, and possibly  
66 other environmental stresses. Importantly, this work also identified two uncharacterized WD40  
67 repeat-like proteins as new tools with which to probe how an atypical SCF complex, SCF<sup>FBS</sup>,  
68 functions via FBX protein N-terminal interaction events.

69

70

71

72

73

74

75

76

77

78

79

80

81

82

83

84

85

86

87

88

89

90

91

92

## 93 INTRODUCTION

94  
95 Essential plant processes, ranging from growth and development to stress responses, are  
96 controlled at the molecular level through selective protein degradation by the ubiquitin 26S  
97 proteasome system (UPS). Protein targets destined for removal are ubiquitylation substrates for  
98 E3 ubiquitin ligases, where one prevalent E3 ligase subtype is the SKP1-Cullin-F-box (SCF)  
99 complex (Hua and Vierstra, 2011). SCF complexes use an interchangeable F-box (FBX) protein  
100 subunit as a substrate adaptor to specifically interact with unique protein targets (Gagne et al.,  
101 2002; Sheard et al., 2010; Calderon Villalobos et al., 2012). FBX proteins almost universally  
102 have structure with two domains: an N-terminal F-box domain facilitates interaction with a SKP  
103 protein and the core SCF complex and a C-terminal domain interacts specifically with the  
104 target(s) (Gagne et al., 2002). This two-domain structure directly bridges core UPS components  
105 to precise protein targets under specific situations, and it places FBX proteins at a dynamic  
106 interface that regulates diverse cellular output pathways.

107  
108 A very small number of FBX proteins across eukaryotes, however, deviate from this typical two-  
109 domain protein structure. Many of these atypical FBX proteins have a centrally located F-box  
110 domain, a C-terminal target interaction domain, and an additional protein interaction domain at  
111 the N-terminus (Jin, 2004; Wang et al., 2014; Lee et al., 2018). In humans, N-terminal domains  
112 can control subcellular localization (Matsumoto et al., 2011), bind to an accessory protein that  
113 assists with C-terminal targeting events (Spruck et al., 2001), or mediate regulatory interactions  
114 with other proteins (Jin, 2004; Kirk et al., 2008; Nelson et al., 2013). The only plant FBX  
115 proteins with established N-terminal interaction dynamics belong to the ZEITLUPE (ZTL),  
116 FLAVIN-BINDING KELCH REPEAT F-BOX1 (FKF1), and LOV KELCH PROTEIN2 (LKP2)  
117 subfamily, which regulates the circadian clock and flowering time (Yasuhara, 2004; Kim et al.,  
118 2007; Sawa et al., 2007; Zoltowski and Imaizumi, 2014; Lee et al., 2018). In addition to a central  
119 F-box domain, the ZTL/FKF1/LKP2 subfamily has an N-terminal blue-light sensing LOV  
120 domain and C-terminal kelch repeats (Zoltowski and Imaizumi, 2014), which are both used to  
121 recruit distinct ubiquitylation substrates (Más et al., 2003; Yasuhara, 2004; Song et al., 2014; Lee  
122 et al., 2018). The N-terminal LOV domain has additional roles that regulate FBX function  
123 through interaction with GIGANTEA (GI), which controls subcellular localization and protein  
124 stability (Kim et al., 2007; Sawa et al., 2007). Thus, across kingdoms, atypical FBX proteins  
125 with an N-terminal protein interaction domain, in addition to a C-terminal targeting domain,  
126 achieve expanded function by having further regulatory capacity and/or coordinating multiple  
127 cellular outputs through a dual targeting structure.

128  
129 F-BOX STRESS INDUCED (FBS) proteins are a far less understood subfamily of four plant  
130 FBX proteins with atypical structure (Maldonado-Calderon et al., 2012; Sepulveda-Garcia and  
131 Rocha-Sosa, 2012; Gonzalez et al., 2017). FBS1 is the founding member of this FBX subfamily  
132 and is recognized for its broad biotic and abiotic stress responsive gene induction profiles  
133 (Maldonado-Calderon et al., 2012; Gonzalez et al., 2017). In FBS1, a centrally located F-box  
134 domain is flanked by two conserved regions present at the N- and C-termini, which do not match  
135 any known protein interaction domains or motifs (Maldonado-Calderon et al., 2012). FBS1  
136 interacts with Arabidopsis SKP1 (ASK1) and can autoubiquitylate (Maldonado-Calderon et al.,  
137 2012; Sepulveda-Garcia and Rocha-Sosa, 2012), suggesting that it forms a functional SCF-type  
138 E3 ligase in vivo. At least five of thirteen Arabidopsis 14-3-3 regulatory proteins bind to FBS1

139 (Sepulveda-Garcia and Rocha-Sosa, 2012). However, because this interaction requires both the  
140 N-terminal region and the F-box domain of FBS1 (Sepulveda-Garcia and Rocha-Sosa, 2012),  
141 and ubiquitylation presumably requires an unhindered F-box domain to interact with the SKP  
142 subunit of the SCF complex (Hua and Vierstra, 2011), 14-3-3s are unlikely ubiquitylation  
143 targets. Furthermore, an inducible *FBS1* gene construct had no discernable effect on FBS1  
144 interactor 14-3-3 $\lambda$  protein abundance (Sepulveda-Garcia and Rocha-Sosa, 2012). Importantly  
145 though, all five FBS1-interacting 14-3-3 proteins are negative regulators in Arabidopsis  
146 responses to cold and/or salt stress (Catala et al., 2014; van Kleeff et al., 2014; Zhou et al.,  
147 2014), which demonstrates another noteworthy cellular link between FBS1 and environmental  
148 stress response networks beyond the broad stress-inducible transcriptional regulation of *FBS1*.  
149

150 More complete understanding of FBS protein function in plants has been stymied by two primary  
151 limitations. First, not knowing selective targeting relationship(s) between SCF<sup>FBS</sup> complexes and  
152 their substrates has left FBS action on cellular output pathways completely enigmatic. Second,  
153 functional redundancy within this family has likely thwarted past efforts seeking to establish a  
154 biological function based on phenotype of Arabidopsis *fsb1* plants (Maldonado-Calderon et al.,  
155 2012; Gonzalez et al., 2017), but no evidence for redundancy exists to confirm this as an  
156 experimental barrier. Here, we identify two highly conserved WD40 repeat-like proteins that  
157 interact with multiple FBS family members in Arabidopsis, which we have named FBS  
158 INTERACTING PROTEINs (FBIPs). Interactions between all four FBS subfamily members and  
159 FBIP proteins occur in the nucleus, and interactions occur exclusively via the N-terminal domain  
160 of FBS proteins. FBIP1 also interacts in the nucleus with NIGT1.1, a DNA-binding GARP  
161 transcriptional repressor and key regulator of plant nitrate and phosphate signaling and starvation  
162 responses (Kiba et al., 2018; Maeda et al., 2018; Ueda et al., 2020a, 2020b). This FBS-FBIP-  
163 NIGT1.1 network of newly identified protein interactions strongly suggests the possibility that  
164 FBS family proteins use N-terminal interaction events to regulate stress genes and, in particular,  
165 genes involved in nitrate and phosphate starvation responses and signaling.  
166

167

## 168 **METHODS**

169  
170  
171

### 170 **Bioinformatics**

172 Gene and protein sequences were obtained from The Arabidopsis Information Resource  
173 ([www.arabidopsis.org](http://www.arabidopsis.org)). Protein sequences were aligned using T-COFFEE  
174 ([www.ebi.ac.uk/Tools/msa/tcoffee](http://www.ebi.ac.uk/Tools/msa/tcoffee)) accessed through the European Bioinformatics Institute  
175 (EBI) website ([www.ebi.ac.uk](http://www.ebi.ac.uk)). WD40 repeat-like sequences were identified in FBIP1 and  
176 FBIP2 using the WD40-repeat protein Structures Predictor data base version 2.0 (WDSPdb 2.0;  
177 [www.wdspdb.com](http://www.wdspdb.com)) (Ma et al., 2019). Basic Local Alignment Search Tool (BLAST) and  
178 Position-Specific Iterative (PSI)-BLAST were accessed through the National Center for  
179 Biotechnology Information (NCBI) website ([www.ncbi.nlm.nih.gov](http://www.ncbi.nlm.nih.gov)) and used to search the  
180 RefSeq database. Candidate protein interactors were identified by searching the SUBA4 database  
181 ([www.suba.live](http://www.suba.live)) (Hooper et al., 2017).  
182

183  
184

### 183 **Gateway cloning**



185 Gene-specific primers (Supplementary Table S1) were used with PCR to amplify coding  
186 sequences from pooled *Arabidopsis thaliana* (accession Col-0) cDNA. Amplicons were inserted  
187 into pENTR/D-TOPO vector (ThermoFisher Scientific) according to the manufacturer's  
188 protocols. Genes were then transferred with LR Clonase II enzyme mix (ThermoFisher  
189 Scientific) into pCL112 or pCL113 (Zhu et al., 2008a) destination vectors for BiFC experiments,  
190 and into pGBKT7-GW (Addgene plasmid #61703) or pGADT7-GW (Addgene plasmid #61702)  
191 destination vectors for yeast two-hybrid experiments. Alternatively (Figure 3B), *FBS1* and  
192 *FBIP1* sequences were cloned into pBI770/pBI771 and tested for interaction, as done previously  
193 (Sepulveda-Garcia and Rocha-Sosa, 2012). Primers used to create *FBS1* truncation constructs are  
194 indicated in Supplementary Table S1.

195

### 196 **Yeast two-hybrid assays**

197

198 *Saccharomyces cerevisiae* cells were grown, transformed, mated, and selected for by standard  
199 yeast protocols. Bait constructs (GAL4 DNA-binding domain, DBD) were transformed into Y2H  
200 Gold and prey constructs (GAL4 activation domain, AD) into Y187 strains by LiAc method  
201 (Takara Bio USA). Haploid strains were mated to produce diploid strains to test for interactions.  
202 Diploid strains were grown for 24 hours at 30 °C in liquid synthetic defined (SD) medium minus  
203 Trp/Leu (-TL) medium with shaking. Cells were then washed in sterile water, cell concentrations  
204 were adjusted to  $OD_{600} = 10^0, 10^{-1}, 10^{-2}, 10^{-3}$ , and 10  $\mu$ L was spotted on SD -TL (control), SD  
205 minus Trp/Leu/His (-TLH), and SD minus Trp/Leu/His (-TLHA) selective plates. Plates were  
206 incubated for two days at 30 °C and then scanned to produce images.

207

### 208 **Bimolecular fluorescence complementation (BiFC)**

209

210 Recombinant plasmids were transformed into *Agrobacterium tumefaciens* strain GV3101  
211 (pMP90) by electroporation and selected under appropriate antibiotics. *A. tumefaciens* seed  
212 cultures were grown in LB with appropriate antibiotic selection for two days with shaking at 30  
213 °C and then used to inoculate 50 mL LB containing appropriate antibiotics plus 10  $\mu$ M  
214 acetosyringone and grown for an additional 24 hours. Cells were pelleted and resuspended in  
215 infiltration medium (10 mM MES, 10 mM  $MgCl_2$ , 100  $\mu$ M acetosyringone) and incubated for  
216 five hours with rocking at room temperature. Cells were pelleted a second time, resuspended in  
217 infiltration medium and appropriate nYFP/cYFP, H2B-RFP constructs were combined at a final  
218  $OD_{600}$  of 1.0 for each test/control construct with suppressor strains (p19,  $\gamma\beta$ , PtoHA, HcPro) at a  
219 final  $OD_{600}$  of 0.5. *Nicotiana benthamia* leaves from four week-old plants were infiltrated by  
220 syringe with the *A. tumefaciens* mixes. The underside of whole leaf mounts was visualized using  
221 laser-scanning confocal microscopy three days after infiltration with a Nikon D-Eclipse C1  
222 Confocal laser scanning microscope (Nikon Instruments) with either: 1) excitation at 488 nm  
223 with an emission band pass filter of 515/30, or 2) excitation at 561 nm with an emission band  
224 pass filter of 650 LP.

225

### 226 **Co-infiltration**

227

228 *FBS1*, *FBIP1*, and *14-3-3 $\lambda$*  were cloned into pGWB17 (4X myc tag), pGWB14 (3X HA tag), or  
229 pGWB12 (VSVG tag) vectors (Nakagawa et al., 2007), respectively, using a Gateway strategy as  
230 above. Recombinant plasmids were transformed by electroporation into *A. tumefaciens* strain

231 C58C1Rif/pGV2260. *A. tumefaciens* was grown to stationary phase in LB medium containing  
232 appropriate antibiotics plus 50 µg/ml acetosyringone. Bacteria were pelleted and washed with 10  
233 mM MgCl<sub>2</sub>, and then resuspended in 10 mM MgCl<sub>2</sub> and 150 µg/ml acetosyringone. Cell  
234 densities were adjusted to OD<sub>600</sub> of 0.5. After 3 h of incubation, *A. tumefaciens* strains containing  
235 each construct were adjusted to varying concentrations and mixed with the same volume of an *A.*  
236 *tumefaciens* strain containing the viral suppressor p19, treated in the same way, but adjusted to  
237 OD<sub>600</sub> of 1.0. The abaxial side of leaves from 3-4 week-old *N. benthamiana* were infiltrated with  
238 this bacterial suspension. After 3 days, leaf material was collected and immediately frozen in  
239 liquid N<sub>2</sub> for protein extraction.

240

## 241 **Protein extraction and Western blotting**

242

243 Approximately 100 µg of frozen tissue was homogenized in 200 µl of 1X Laemmli loading  
244 buffer plus 4 M urea, boiled 5 minutes and centrifuged at 10,000 x g for five minutes. 10 µl of  
245 the supernatant were loaded onto 8%, 10%, or 15% polyacrylamide gels and subjected to SDS-  
246 PAGE using standard protocols. Separated proteins were blotted onto a Hybond-P+ membrane  
247 (Amersham Pharmacia Biotech) using standard protocols, and then membranes were probed with  
248 anti-c-Myc, anti-HA antibody, or anti-VSVG antibodies (all from Sigma). Blots were developed  
249 using an alkaline phosphatase kit (BCIP/NBT kit; Invitrogen).

250

## 251 **AGI numbers**

252

253 FBS1 (At1g61340), FBS2 (At4g21510), FBS3 (At4g05010), FBS4 (At4g35930), FBIP1  
254 (At3g54190), FBIP2 (At2g38630), NIGT1.1 (At1g25550)

255

256

## 257 **RESULTS**

258

### 259 **FBS protein interaction with ASK1**

260 FBS1 is the founding protein of a four-member FBX protein subfamily (FBS1 – FBS4). FBS2 –  
261 FBS4, like FBS1, share non-canonical structure with a centrally located F-box domain and  
262 conserved regions at their N- and C- termini (Figure 1A). The conserved region at FBS N-  
263 termini spans approximately 20 residues, while the conserved region at the C-terminus  
264 encompasses about 35 (Figure 1A). FBS1 interacts with ASK1 and autoubiquitylates, indicating  
265 FBS1 likely participates in functional SCF complexes (Maldonado-Calderon et al., 2012;  
266 Sepulveda-Garcia and Rocha-Sosa, 2012). However, the ability of other FBS family members to  
267 interact with ASK proteins remains unknown, as does the possibility of functional redundancy  
268 among family members. To interrogate this possibility, all four FBS family members were tested  
269 as bait constructs (DBD, GAL4 DNA-binding domain) for interaction with ASK1 as prey (AD,  
270 GAL4 activation domain) under less stringent (-TLH) and more stringent (-TLHA) nutritional  
271 selection. Interactions were apparent between all four FBS family members on -TLH, although  
272 only very minimal growth was observed for FBS2 (Figure 1B). Only interactions between FBS1  
273 and FBS4 with ASK1 were apparent under most stringent selection (-TLHA) (Figure 1B). Since  
274 Arabidopsis has 21 ASK proteins, it is possible the FBS proteins showing minimal partnering  
275 with ASK1 instead interact more strongly with other untested ASKs (Kuroda et al., 2012). These

276 interactions show, however, that all FBS2 – FBS4 are viable candidates for functional SCF  
277 complex substrate adapters, like FBS1.

278

### 279 **Identification of a new FBS1 interactor**

280

281 In addition to ASK1, the only known FBS1 interacting proteins are 14-3-3 proteins (Sepulveda-  
282 Garcia and Rocha-Sosa, 2012). However, because interaction dynamics are not consistent with  
283 ubiquitylation of 14-3-3 proteins by SCF<sup>FBS1</sup> (Sepulveda-Garcia and Rocha-Sosa, 2012), we  
284 sought additional FBS1 interactors as candidate targets that could connect FBS proteins to  
285 biological processes. Two additional related proteins were identified as partners for FBS1, which  
286 we have named FBS INTERACTING PROTEINs (FBIPs). FBIP1 (At3g54190) was identified in  
287 the same yeast two-hybrid screen that found 14-3-3 proteins as FBS1 interactors (Sepulveda-  
288 Garcia and Rocha-Sosa, 2012). FBIP1 is also listed as an FBS1 interactor by the SUBA4  
289 database ([www.suba.live](http://www.suba.live)) from previous high-throughput protein-protein interaction (PPI)  
290 screening (Arabidopsis Interactome Mapping Consortium et al., 2011; Hooper et al., 2017).  
291 FBIP1 is 467 residues in length and is a member of the transducin / WD40 repeat-like  
292 superfamily of proteins. WD40 repeats typically form a  $\beta$ -propeller domain that acts as a scaffold  
293 in mediating protein-protein or protein-DNA interactions (Jain and Pandey, 2018). Seven  
294 putative WD40 repeat-like sequences were predicted in FBIP1 by the WD40-repeat protein  
295 Structures Predictor database version 2.0 (WDSPdb 2.0) (Ma et al., 2019), although these  
296 predictions fall into the low confidence category (Figure 2). A second FBIP protein (At2g38630)  
297 was identified in the Arabidopsis genome by BLAST search, which we have named FBIP2.  
298 Protein sequence identity and similarity between FBIP1 and FBIP2 are just over 91% and 96%,  
299 respectively (Figure 2).

300

301 We gained no additional insight about FBIP function using various bioinformatics resources.  
302 Other than putative WD repeat-like sequences, no sequence features were identified using  
303 various domain or motif prediction programs. BLAST and PSI-BLAST searches with FBIP1 and  
304 FBIP2 sequences failed to identify additional significant hits in Arabidopsis. We did, however,  
305 find very highly conserved FBIP sequences throughout the plant kingdom, including in  
306 bryophytes (the top BLAST hit in *Physcomitrella patens* is about 77% identical and 85% similar  
307 to *Arabidopsis* FBIP1). By investigating AtGenExpress ATH1 array data sets (Schmid et al.,  
308 2005; Kilian et al., 2007; Goda et al., 2008), we found that *FBIP1* is constitutively expressed in  
309 most tissues and organs of Arabidopsis, and throughout its life cycle, but we found no conditions  
310 where *FBIP1* is more highly expressed compared to other conditions. *FBIP2* is not represented  
311 on the ATH1 array.

312

### 313 **FBS interactions with FBIPs**

314

315 We confirmed that full-length FBS1 and FBIP1 interact by yeast two-hybrid analysis. Interaction  
316 between FBS1 and FBIP1 elicited growth in yeast strains on both less stringent (-TLH) and more  
317 stringent (-TLHA) nutritional selection, and FBS1 yielded growth with FBIP2 on -TLH (Figure  
318 3A). Family-wide interactions between each FBS protein and the two FBIP proteins were also  
319 assessed (Figure S1). Growth was also observed for FBS3 and FBIP1, but not with FBS2 or  
320 FBS4. No additional interactions were observed with FBIP2. Collectively, yeast two-hybrid  
321 results suggest that FBS1 and FBIP1 might be the primary FBS-FBIP protein interaction pair, or

322 possibly bind with strongest affinity, but that some other family-wide interactions might be  
323 possible.

324  
325 FBS proteins have two regions of unknown function outside of the F-box domain and,  
326 presumably, at least one of these interacts with a target. In order to determine which parts of  
327 FBS1 are important for FBIP1 interaction, we created truncated versions of FBS1 with the N-  
328 terminal (NT), F-box, or C-terminal (CT) regions removed in different combinations and tested  
329 under stringent (-TLHA) selection (Figure 3B). Removing the N-terminal region ( $\Delta$ NT-FBS1<sub>81-</sub>  
330<sub>185</sub>) abolished the ability of FBS1 to interact with FBIP1, while removal of the F-box domain  
331 ( $\Delta$ F-FBS1 <sub>$\Delta$ 84-135</sub>) or C-terminal region ( $\Delta$ CT-FBS1<sub>1-128</sub>) did not. The FBS1 N-terminal region  
332 (NT-FBS1<sub>1-80</sub>) in combination with full-length FBIP1 yielded growth on -TLHA, indicating that  
333 the FBS1 N-terminal domain alone is sufficient to mediate this interaction.

334  
335 In the conserved N-terminal domains of FBS1 and FBS2 we found an overlapping LXLXL  
336 sequence (Figure 1A), which is the most prominent form of an EAR motif found in many  
337 different types of transcriptional regulators (Kagale and Rozwadowski, 2011; Shyu et al., 2012).  
338 The EAR motif mediates interaction with the WD40 repeat-containing protein TOPLESS (TPL)  
339 and TOPLESS RELATED (TPR) co-repressor proteins (Long, 2006; Pauwels et al., 2010;  
340 Causier et al., 2012). We considered whether this LXLXL sequence in the N-terminal region of  
341 FBS1 might: 1) function as a canonical EAR motif to interact with TOPLESS, and/or 2) if it  
342 could be important for mediating interactions with FBIPs. However, substituting all three leucine  
343 residues for alanine in FBS1 did not alter its interaction with FBIP1, and FBS1 did not interact  
344 with TPL (both as bait or as prey) in our yeast two-hybrid system.

#### 345 **FBS interactions with FBIP occur in the nucleus**

346  
347  
348 We next used bimolecular fluorescence complementation (BiFC) to test FBS interaction with  
349 FBIP in plants and determine where the interaction occurs in a cell. FBS and FBIP family  
350 proteins were expressed in *Nicotiana benthamiana* leaves as C-terminal fusions to either N-  
351 terminal (nYFP) or C-terminal (cYFP) halves of yellow fluorescent protein (YFP). In multiple  
352 independent experiments, YFP fluorescence was observed for pairings between FBS1 and FBIP1  
353 and FBIP2 (Figure 4). This YFP signal co-localized with that of a co-infiltrated H2B-RFP  
354 construct, which localizes exclusively in the nucleus (Wang et al., 2013), and shows that  
355 interactions between FBS1 and FBIP proteins also occur in the nucleus. Similar experiments  
356 found that FBS2 – FBS4 also interact with FBIP1 in the nucleus (Supplementary Figure S2). We  
357 observed interactions for FBS3 and FBS4 with FBIP2 (Supplementary Figure S3), although we  
358 note that these interactions were more variable in number of YFP positive nuclei across  
359 independent replicates. We did not observe any interactions between FBS2 and FBIP2. All FBS  
360 and FBIP fusion protein constructs were tested as pairs with empty nYFP or cYFP vectors, and  
361 in all pairings we were unable to detect any fluorescent signal similar FBS/FBIP test pairs  
362 (Supplementary Figure S4). These findings show that in plants FBS proteins participate in  
363 family-wide interactions in the nucleus.

#### 364 **FBS1 destabilizes FBIP1**

365  
366



367 With interaction established between multiple FBS and FBIP protein pairs, we next asked if the  
368 protein abundance relationship between FBS1 and FBIP1 is consistent with FBIP1 being a  
369 ubiquitylation target of SCF<sup>FBS1</sup>. If a protein is ubiquitylated by a particular SCF complex and  
370 subsequently degraded by the 26S proteasome, then increasing abundance of the F-box  
371 component typically increases in vivo targeting and decreases substrate abundance (dos Santos  
372 Maraschin et al., 2009). We therefore tested the effects of varying FBS1 protein levels on FBIP1  
373 abundance in our *N. benthamiana* expression system by co-infiltrating *Agrobacterium* harboring  
374 these test constructs in different relative concentrations. Increasing the presence of FBS1 protein  
375 resulted in a corresponding decrease in FBIP1 protein abundance by Western blot analysis  
376 (Figure 5). In comparison, when FBS1 abundance was increased relative to co-infiltrated 14-3-3λ  
377 in an identical setup we did not observe any decrease in 14-3-3λ abundance as the amount of  
378 expressed FBS1 was increased (Supplementary Figure S5). This finding is congruous with  
379 previous observations that FBS1 and 14-3-3 interactions are not consistent with targeting  
380 (Sepulveda-Garcia and Rocha-Sosa, 2012). Therefore, because the abundance of FBIP1  
381 decreases in an FBS1-dependent manner, we conclude that FBIPs are viable candidates for  
382 SCF<sup>FBS1</sup> ubiquitylation targets.

383

### 384 **Interaction between FBIP1 and NIGT1.1**

385

386 Interaction between FBS and FBIP protein families represents a newly recognized link between  
387 an SCF complex with stress inducible components (ie. *FBS1* gene expression; 14-3-3 interaction)  
388 and a potential targeting output. However, without knowing the precise biological function of  
389 FBIP proteins we cannot know the consequences of FBS-FBIP interactions, nor can we strongly  
390 connect FBS1 to an exact cellular pathway. Therefore, we examined protein interactions in the  
391 SUBA4 database for FBIP1, with particular consideration for our findings that FBS and FBIP  
392 interactions occur in the nucleus. One protein reported to interact with FBIP1 was Nitrate-  
393 Inducible GARP-type Transcriptional Repressor 1.1 (NIGT1.1/HHO3; At1g25550). NIGT1.1 is  
394 a DNA-binding transcriptional repressor and a central regulator of gene expression programs  
395 that coordinate nitrate (NO<sub>3</sub><sup>-</sup>) and phosphate (PO<sub>4</sub><sup>3-</sup>) signaling and starvation responses in plants  
396 (Kiba et al., 2018; Maeda et al., 2018; Ueda and Yanagisawa, 2019; Ueda et al., 2020a, 2020b).  
397 We tested this predicted interaction between FBIP1 and NIGT1.1 in yeast two-hybrid assays and  
398 observed growth on both less stringent (-TLH) and more stringent (-TLHA) conditions (Figure  
399 6A). In BiFC, both FBIP1 and FBIP2 interacted with NIGT1.1 in the nucleus, as demonstrated  
400 by co-localization with H2B-RFP (Figure 6B). These interactions link FBS proteins through  
401 FBIP proteins to a DNA-binding transcriptional repressor, which suggests that at least one  
402 function of FBS proteins is to directly regulate gene expression programs that relate to  
403 environmental conditions (ie. nitrate and phosphate macronutrient availability).

404

405

## 406 **DISCUSSION**

407

408 Prior work with the FBS subfamily strongly alluded to its role in plant stress responses  
409 (Maldonado-Calderon et al., 2012; Sepulveda-Garcia and Rocha-Sosa, 2012; Gonzalez et al.,  
410 2017), but detailed understanding was limited by the unknown nature of ubiquitylation target(s)  
411 and by possible redundancy within the *FBS* gene family. Here, we have identified a pair of  
412 WD40 repeat-like superfamily proteins, FBIP1 and FBIP2, that both interact with FBS family

413 proteins. Family-wide interactions between FBS and FBIP proteins in plants indicate that  
414 redundancy issues likely need to be circumvented before genetic approaches will yield full  
415 insight into *FBS* gene function based on phenotype analysis. Nonetheless, FBIP proteins are  
416 strong candidates for SCF<sup>FBS</sup> ubiquitylation targeting. FBIP interaction with NIGT1.1, a key  
417 regulator of nitrate responsive genes, directly links FBS proteins to nuclear and transcription  
418 regulatory processes (Figure 7). Collectively, the FBS-FBIP-NIGT1.1 module is a new protein  
419 interaction network in which to understand regulation of stress genes by an SCF-type E3 ligase  
420 (Figure 7). Finally, FBIP and FBS interactions provide new context with which to investigate  
421 FBX protein N-terminal events, and to further understand how this unique subfamily of FBX  
422 proteins might couple N-terminal and C-terminal events to integrate cellular outputs to help  
423 plants maintain resilience under environmental stress.

424

### 425 **The molecular function of FBIP proteins**

426

427 Our findings point to a direct role for FBS proteins in gene regulation, but knowing this with  
428 certainty will require understanding the molecular function of FBIP proteins. Some plant  
429 nuclear-localized WD40 repeat proteins have direct actions in transcription regulation (Causier et  
430 al., 2012; Ke et al., 2015; Long and Schiefelbein, 2020) or chromatin modification (Li et al.,  
431 2007; Zhu et al., 2008b; Mehdi et al., 2016), and knowledge of these roles should inform  
432 hypotheses and future work. For example, TOPLESS (TPL) is a well-studied WD40 repeat-  
433 containing co-repressor protein that interacts with multiple transcriptional complexes acting in  
434 diverse pathways (ie. auxin, jasmonate, development) and recruits chromatin modifying enzymes  
435 to repress gene expression (Krogan et al., 2012; Wang et al., 2013). TRANSPARENT TESTA  
436 GLABRA 1 (TTG1), another WD40 repeat protein, serves as a scaffold and mediates different  
437 combinations of bHLH and R2R3-type MYB transcription factors to regulate flavonoid  
438 metabolism and various developmental processes (Lloyd et al., 2017; Long and Schiefelbein,  
439 2020). Considering these established roles for WD40 repeat proteins in nuclear events, a few  
440 possibilities seem readily apparent for FBIPs in the context of NIGT1.1-mediated transcription  
441 regulation. First, FBIPs could recruit additional proteins that either enable or inhibit the  
442 transcriptional repression activity of NIGT1.1, potentially by interfacing with chromatin  
443 modifying enzymes, such as histone deacetylases (Wang et al., 2013). Second, as NIGT1.1 itself  
444 belongs to a subfamily of four NIGT1 transcription factors that dimerize (Yanagisawa, 2013;  
445 Ueda et al., 2020b), it is possible that FBIPs in some way mediate *in vivo* pairings and are  
446 functionally analogous to TTG1. Furthermore, as there are 56 GARP-type transcriptional  
447 repressors in Arabidopsis (Safi et al., 2017), it is possible that FBIP proteins could interact with  
448 some of these other regulators to exert broader effects on gene regulation beyond nitrate- and  
449 phosphate-dependent processes. We note that other GARP family transcription factors regulate  
450 ABA- and JA-responsive genes (Merelo et al., 2013), and so past work showing that *FBS1*  
451 impacts genes responsive to these two stress hormones is consistent with this notion (Gonzalez et  
452 al., 2017). Future efforts will be aimed at understanding the full spectrum of interactions between  
453 the two FBIP proteins and other GARP family transcription factors, with special focus on the  
454 NIGT1 subfamily, as well as whether FBIPs interact with additional proteins that may assist in  
455 gene regulation.

456

### 457 **FBIPs as candidate ubiquitylation targets**

458



459 A number of important questions surround the consequence of FBIP proteins as FBS interactors,  
460 but hypotheses for immediate future work are equally apparent. Knowing that SCF complexes in  
461 some unique contexts ubiquitylate targets via FBX protein N-terminal interactions (Lee et al.,  
462 2018), and that FBS1 appears to destabilize FBIP1 (Figure 5), a leading hypothesis is that FBIP  
463 proteins are bona fide ubiquitylation substrates for SCF<sup>FBS</sup>. Rigorous assessment of in vivo  
464 interaction dynamics between SCF<sup>FBS</sup> complexes and FBIP proteins, and whether interaction  
465 stimulates ubiquitylation-dependent degradation of FBIP proteins, will be critical lines of inquiry  
466 in future work. Given the constitutive gene expression profile of *FBIP1* across publicly  
467 accessible transcriptome data sets, it could be that FBIP proteins are components of a stress-  
468 response system that is triggered at the post-translational level. An obvious following question,  
469 then, is whether FBIP proteins are degraded in response to changing environmental conditions  
470 and, if so, whether some factor (ie. post-translational modification) stimulates SCF<sup>FBS</sup>  
471 association with FBIP proteins under these conditions. The idea that additional in vivo factors or  
472 modification mediates FBS/FBIP interaction is consistent with notion that we observed more  
473 family-wide interactions in our in plant BiFC experiments compared to yeast two-hybrid.

474  
475 With current understanding, however, we cannot completely exclude the possibility that FBIP  
476 proteins are not targets, but instead serve an alternative function that enables (or inhibits) FBS  
477 action. An idea with precedence is that FBIP proteins are accessories that recruit other proteins  
478 as ubiquitylation targets. For example, in Arabidopsis, KAI2 and D14 interact with FBX protein  
479 MAX2 in SCF<sup>MAX2</sup> complex to mediate ubiquitylation of SMXL transcription factors (Wang et  
480 al., 2020). In humans, Cks1 directly associates with the N-terminus of FBX protein Skp2 to  
481 direct SCF<sup>Skp2</sup> interaction with ubiquitylation target p27 in human cell cycle regulation (Spruck  
482 et al., 2001; Skaar et al., 2013). A parallel, but intimately connected, line of questioning involves  
483 identifying an FBS C-terminal region-interacting protein that we presume to exist. Knowing this  
484 additional putative interactor may aid in addressing important aspects of FBIP function, and  
485 future work can investigate the coordination of higher order complex assembly and/or possible  
486 situations of dual targeting and co-occurring processes.

#### 488 **FBS proteins are new tools with which to probe regulation of nitrate/phosphate starvation** 489 **responses**

490  
491 Nitrate and phosphate are two indispensable macronutrients, but their abundances are highly  
492 variable in most environments. The subfamily of four NIGT1 transcription factors directly  
493 regulates hundreds of nitrate responsive genes by: 1) helping to elicit a quick-pulse response to  
494 nitrate under some regulatory contexts (Ueda and Yanagisawa, 2019), or 2) control sustained  
495 diminished expression in other regulatory contexts (Medici et al., 2015; Ueda and Yanagisawa,  
496 2019). Nitrate uptake and assimilation by plants is intimately coordinated with that of phosphate,  
497 and at least some regulatory events that accomplish this at the gene expression level occur  
498 through NIGT1 activities (Ueda and Yanagisawa, 2019). Though functional relationships  
499 between FBS, FBIP, and NIGT1.1 proteins are not yet known, recent work with NIGT1 proteins  
500 and their regulation nitrate and phosphate responsive gene networks gives invaluable  
501 experimental context for future work (Kiba et al., 2018; Maeda et al., 2018; Ueda et al., 2020a).  
502 Coupling Arabidopsis genetic resources related to *FBS* and *FBIP* genes to those of *NIGT1.1* will  
503 likely advance our understanding of how these factors work together, for example whether FBIP  
504 proteins have a positive effect on NIGT1.1 (and other NIGT1 family proteins), to accomplish

505 regulation of nitrate-responsive transcriptional processes in various environmental contexts (ie.  
506 cold or salt stress). Furthermore, as both *NIGT1* and *FBSI* are very rapidly induced by their  
507 respective stress-inducing situations (Maldonado-Calderon et al., 2012; Sawaki et al., 2013;  
508 Gonzalez et al., 2017), understanding how these factors work together may help further define  
509 temporal priorities and resource management in nitrogen acquisition and other parts of stress  
510 responses. Taken together, harnessing *FBS* and *FBIP* genes will present new opportunities by  
511 which to understand how plants integrate and manage nitrate and phosphate stresses with other  
512 stress conditions.

513  
514 Different stress response pathways do not work in isolation (Rasmussen et al., 2013), but are  
515 coordinated with one another to collectively contribute to comprehensive health of plants under  
516 duress. However, much remains to be learned about the integration of different pathways. Given  
517 its broad biotic and abiotic stress-triggered induction, as well as its stress hormone  
518 responsiveness (Maldonado-Calderon et al., 2012; Gonzalez et al., 2017), *FBSI* may act in a  
519 common cellular pathway or process that is more universally harnessed to aid compromised, or  
520 otherwise challenged, plant cells. Further support for this notion comes from the fact that *FBSI*  
521 interacts with multiple 14-3-3 proteins that work at least in both salt and cold stresses  
522 (Sepulveda-Garcia and Rocha-Sosa, 2012; Catala et al., 2014; van Kleeff et al., 2014; Zhou et  
523 al., 2014). The mechanistic connection delineated by an *FBS*/*FBIP*/*NIGT1* module may connect  
524 a more globally induced environmental stress response to a nitrate uptake/assimilation program  
525 mediated by *NIGT1* and co-acting proteins. In fact, nitrogen, in particular the nitrate and  
526 ammonia forms, enhances plant performance in various forms of abiotic stress, as it is required  
527 for *de novo* synthesis of various metabolites and proteins with protective properties (Zhang et al.,  
528 2018; Rohilla and Yadav, 2019; Li et al., 2020). In seeming contrast, however, some abiotic  
529 stress-responsive transcriptional networks naturally limit expression of genes central to nitrogen  
530 uptake and assimilation (Goel and Singh, 2015). These observations underscore the notion that  
531 there is still much to learn about the complexities of these gene regulatory networks and  
532 physiological processes acting in broader stress contexts. This work, including the subsequent  
533 hypotheses it generates, provides a new mechanistic framework in which to assess how an  
534 atypical SCF complex may coordinate cellular stress pathways, including those acting in nitrate  
535 and phosphate uptake and assimilation, through transcription regulation events.

536

537

## 538 **FUNDING**

539

540 This work was supported by grants from the M.J. Murdock Charitable Trust (NS-2016262 and  
541 20141205:MNL:11/20/14) for materials and student summer research stipends, and funds from  
542 University Enrichment Committee (UEC) at the University of Puget Sound for materials and  
543 student summer research stipends.

544

545

## 546 **AUTHOR CONTRIBUTIONS**

547

548 ESG, ECF, EVP, AAB, LEO, AAF, AJR, and BT conducted the experiments. All authors  
549 designed the experiments, analyzed the data, and approved the final version of the manuscript.  
550 BT wrote the manuscript.

551  
552  
553  
554  
555  
556  
557  
558  
559  
560  
561  
562  
563  
564  
565  
566  
567  
568  
569  
570  
571  
572  
573  
574  
575  
576  
577  
578  
579  
580  
581  
582  
583  
584  
585  
586  
587  
588  
589

## ACKNOWLEDGEMENTS

We thank David Somers (The Ohio State University) for the H2B-RFP construct, Frank Harmon (University of California at Berkeley / USDA Plant Gene Expression Center) for the yeast two-hybrid vectors, Faride Unda (University of British Columbia) for the BiFC vectors, and Ruirui Huang and Vivian Irish (Yale University) for the yeast two-hybrid TOPLESS constructs. We also thank Marisa Weiss for her help with cloning *NIGTI.1* and Andreas Madlung (University of Puget Sound) for critical reading of the manuscript and other helpful discussions. Finally, we would like to thank Michal Morrison-Kerr (University of Puget Sound) for her indispensable help in supporting Puget Sound undergraduate research students.

## REFERENCES

- Arabidopsis Interactome Mapping Consortium, Dreze, M., Carvunis, A.-R., Charlotteaux, B., Galli, M., Pevzner, S. J., et al. (2011). Evidence for Network Evolution in an Arabidopsis Interactome Map. *Science* 333, 601–607. doi:10.1126/science.1203877.
- Calderon Villalobos, L. I., Lee, S., De Oliveira, C., Ivetac, A., Brandt, W., Armitage, L., et al. (2012). A combinatorial TIR1/AFB-Aux/IAA co-receptor system for differential sensing of auxin. *Nat Chem Biol* 8, 477–85. doi:10.1038/nchembio.926.
- Catala, R., Lopez-Cobollo, R., Mar Castellano, M., Angosto, T., Alonso, J. M., Ecker, J. R., et al. (2014). The Arabidopsis 14-3-3 protein RARE COLD INDUCIBLE 1A links low-temperature response and ethylene biosynthesis to regulate freezing tolerance and cold acclimation. *Plant Cell* 26, 3326–42. doi:10.1105/tpc.114.127605.
- Causier, B., Ashworth, M., Guo, W., and Davies, B. (2012). The TOPLESS Interactome: A Framework for Gene Repression in Arabidopsis. *PLANT Physiol.* 158, 423–438. doi:10.1104/pp.111.186999.
- dos Santos Maraschin, F., Memelink, J., and Offringa, R. (2009). Auxin-induced, SCF<sup>TIR1</sup> - mediated poly-ubiquitination marks AUX/IAA proteins for degradation. *Plant J.* 59, 100–109. doi:10.1111/j.1365-313X.2009.03854.x.
- Gagne, J. M., Downes, B. P., Shiu, S. H., Durski, A. M., and Vierstra, R. D. (2002). The F-box subunit of the SCF E3 complex is encoded by a diverse superfamily of genes in Arabidopsis. *Proc Natl Acad Sci U S A* 99, 11519–24. doi:10.1073/pnas.162339999.
- Goda, H., Sasaki, E., Akiyama, K., Maruyama-Nakashita, A., Nakabayashi, K., Li, W., et al. (2008). The AtGenExpress hormone and chemical treatment data set: experimental design, data evaluation, model data analysis and data access. *Plant J.* 55, 526–542. doi:10.1111/j.1365-313X.2008.03510.x.

- 590 Goel, P., and Singh, A. K. (2015). Abiotic Stresses Downregulate Key Genes Involved in  
591 Nitrogen Uptake and Assimilation in Brassica juncea L. *PLOS ONE* 10, e0143645.  
592 doi:10.1371/journal.pone.0143645.
- 593 Gonzalez, L. E., Keller, K., Chan, K. X., Gessel, M. M., and Thines, B. C. (2017). Transcriptome  
594 analysis uncovers Arabidopsis F-BOX STRESS INDUCED 1 as a regulator of jasmonic  
595 acid and abscisic acid stress gene expression. *BMC Genomics* 18. doi:10.1186/s12864-  
596 017-3864-6.
- 597 Hooper, C. M., Castleden, I. R., Tanz, S. K., Aryamanesh, N., and Millar, A. H. (2017). SUBA4:  
598 the interactive data analysis centre for Arabidopsis subcellular protein locations. *Nucleic  
599 Acids Res.* 45, D1064–D1074. doi:10.1093/nar/gkw1041.
- 600 Hua, Z., and Vierstra, R. D. (2011). The cullin-RING ubiquitin-protein ligases. *Annu Rev Plant  
601 Biol* 62, 299–334. doi:10.1146/annurev-arplant-042809-112256.
- 602 Jain, B. P., and Pandey, S. (2018). WD40 Repeat Proteins: Signalling Scaffold with Diverse  
603 Functions. *Protein J.* 37, 391–406. doi:10.1007/s10930-018-9785-7.
- 604 Jin, J. (2004). Systematic analysis and nomenclature of mammalian F-box proteins. *Genes Dev.*  
605 18, 2573–2580. doi:10.1101/gad.1255304.
- 606 Kagale, S., and Rozwadowski, K. (2011). EAR motif-mediated transcriptional repression in  
607 plants: An underlying mechanism for epigenetic regulation of gene expression.  
608 *Epigenetics* 6, 141–146. doi:10.4161/epi.6.2.13627.
- 609 Ke, J., Ma, H., Gu, X., Thelen, A., Brunzelle, J. S., Li, J., et al. (2015). Structural basis for  
610 recognition of diverse transcriptional repressors by the TOPLESS family of corepressors.  
611 *Sci. Adv.* 1, e1500107. doi:10.1126/sciadv.1500107.
- 612 Kiba, T., Inaba, J., Kudo, T., Ueda, N., Konishi, M., Mitsuda, N., et al. (2018). Repression of  
613 Nitrogen Starvation Responses by Members of the Arabidopsis GARP-Type  
614 Transcription Factor NIGT1/HRS1 Subfamily. *Plant Cell* 30, 925–945.  
615 doi:10.1105/tpc.17.00810.
- 616 Kilian, J., Whitehead, D., Horak, J., Wanke, D., Weinl, S., Batistic, O., et al. (2007). The  
617 AtGenExpress global stress expression data set: protocols, evaluation and model data  
618 analysis of UV-B light, drought and cold stress responses. *Plant J* 50, 347–63.  
619 doi:10.1111/j.1365-313X.2007.03052.x.
- 620 Kim, W. Y., Fujiwara, S., Suh, S. S., Kim, J., Kim, Y., Han, L., et al. (2007). ZEITLUPE is a  
621 circadian photoreceptor stabilized by GIGANTEA in blue light. *Nature* 449, 356–60.  
622 doi:10.1038/nature06132.
- 623 Kirk, R., Laman, H., Knowles, P. P., Murray-Rust, J., Lomonosov, M., Meziane, E. K., et al.  
624 (2008). Structure of a Conserved Dimerization Domain within the F-box Protein Fbxo7  
625 and the PI31 Proteasome Inhibitor. *J. Biol. Chem.* 283, 22325–22335.  
626 doi:10.1074/jbc.M709900200.

- 627 Krogan, N. T., Hogan, K., and Long, J. A. (2012). APETALA2 negatively regulates multiple  
628 floral organ identity genes in Arabidopsis by recruiting the co-repressor TOPLESS and  
629 the histone deacetylase HDA19. *Development* 139, 4180–4190. doi:10.1242/dev.085407.
- 630 Kuroda, H., Yanagawa, Y., Takahashi, N., Horii, Y., and Matsui, M. (2012). A comprehensive  
631 analysis of interaction and localization of Arabidopsis SKP1-like (ASK) and F-box  
632 (FBX) proteins. *PLoS One* 7, e50009. doi:10.1371/journal.pone.0050009.
- 633 Lee, C.-M., Fekete, A., Li, M.-W., Adamchek, C., Webb, K., Pruneda-Paz, J., et al. (2018).  
634 Decoys Untangle Complicated Redundancy and Reveal Targets of Circadian Clock F-  
635 Box Proteins. *Plant Physiol.* 177, 1170–1186. doi:10.1104/pp.18.00331.
- 636 Li, H., He, Z., Lu, G., Lee, S. C., Alonso, J., Ecker, J. R., et al. (2007). A WD40 Domain  
637 Cyclophilin Interacts with Histone H3 and Functions in Gene Repression and  
638 Organogenesis in *Arabidopsis*. *Plant Cell* 19, 2403–2416. doi:10.1105/tpc.107.053579.
- 639 Li, S., Zhou, L., Addo-Danso, S. D., Ding, G., Sun, M., Wu, S., et al. (2020). Nitrogen supply  
640 enhances the physiological resistance of Chinese fir plantlets under polyethylene glycol  
641 (PEG)-induced drought stress. *Sci. Rep.* 10, 7509. doi:10.1038/s41598-020-64161-7.
- 642 Lloyd, A., Brockman, A., Aguirre, L., Campbell, A., Bean, A., Cantero, A., et al. (2017).  
643 Advances in the MYB–bHLH–WD Repeat (MBW) Pigment Regulatory Model: Addition  
644 of a WRKY Factor and Co-option of an Anthocyanin MYB for Betalain Regulation.  
645 *Plant Cell Physiol.* 58, 1431–1441. doi:10.1093/pcp/pcx075.
- 646 Long, J. A. (2006). TOPLESS Regulates Apical Embryonic Fate in Arabidopsis. *Science* 312,  
647 1520–1523. doi:10.1126/science.1123841.
- 648 Long, Y., and Schiefelbein, J. (2020). Novel TTG1 Mutants Modify Root-Hair Pattern  
649 Formation in Arabidopsis. *Front. Plant Sci.* 11, 383. doi:10.3389/fpls.2020.00383.
- 650 Ma, J., An, K., Zhou, J.-B., Wu, N.-S., Wang, Y., Ye, Z.-Q., et al. (2019). WDSPdb: an updated  
651 resource for WD40 proteins. *Bioinformatics* 35, 4824–4826.  
652 doi:10.1093/bioinformatics/btz460.
- 653 Maeda, Y., Konishi, M., Kiba, T., Sakuraba, Y., Sawaki, N., Kurai, T., et al. (2018). A NIGT1-  
654 centred transcriptional cascade regulates nitrate signalling and incorporates phosphorus  
655 starvation signals in Arabidopsis. *Nat. Commun.* 9, 1376. doi:10.1038/s41467-018-  
656 03832-6.
- 657 Maldonado-Calderon, M. T., Sepulveda-Garcia, E., and Rocha-Sosa, M. (2012). Characterization  
658 of novel F-box proteins in plants induced by biotic and abiotic stress. *Plant Sci* 185–186,  
659 208–17. doi:10.1016/j.plantsci.2011.10.013.
- 660 Más, P., Kim, W.-Y., Somers, D. E., and Kay, S. A. (2003). Targeted degradation of TOC1 by  
661 ZTL modulates circadian function in Arabidopsis thaliana. *Nature* 426, 567–570.  
662 doi:10.1038/nature02163.



- 663 Matsumoto, A., Tateishi, Y., Onoyama, I., Okita, Y., Nakayama, K., and Nakayama, K. I.  
664 (2011). Fbxw7 $\beta$  resides in the endoplasmic reticulum membrane and protects cells from  
665 oxidative stress. *Cancer Sci.* 102, 749–755. doi:10.1111/j.1349-7006.2011.01851.x.
- 666 Medici, A., Marshall-Colon, A., Ronzier, E., Szponarski, W., Wang, R., Gojon, A., et al. (2015).  
667 AtNIGT1/HRS1 integrates nitrate and phosphate signals at the Arabidopsis root tip. *Nat.*  
668 *Commun.* 6, 6274. doi:10.1038/ncomms7274.
- 669 Mehdi, S., Derkacheva, M., Ramström, M., Kralemann, L., Bergquist, J., and Hennig, L. (2016).  
670 The WD40 Domain Protein MSI1 Functions in a Histone Deacetylase Complex to Fine-  
671 Tune Abscisic Acid Signaling. *Plant Cell* 28, 42–54. doi:10.1105/tpc.15.00763.
- 672 Merelo, P., Xie, Y., Brand, L., Ott, F., Weigel, D., Bowman, J. L., et al. (2013). Genome-Wide  
673 Identification of KANADI1 Target Genes. *PLoS ONE* 8, e77341.  
674 doi:10.1371/journal.pone.0077341.
- 675 Nakagawa, T., Kurose, T., Hino, T., Tanaka, K., Kawamukai, M., Niwa, Y., et al. (2007).  
676 Development of series of gateway binary vectors, pGWBs, for realizing efficient  
677 construction of fusion genes for plant transformation. *J. Biosci. Bioeng.* 104, 34–41.
- 678 Nelson, D. E., Randle, S. J., and Laman, H. (2013). Beyond ubiquitination: the atypical functions  
679 of Fbxo7 and other F-box proteins. *Open Biol.* 3, 130131. doi:10.1098/rsob.130131.
- 680 Pauwels, L., Barbero, G. F., Geerinck, J., Tilleman, S., Grunewald, W., Pérez, A. C., et al.  
681 (2010). NINJA connects the co-repressor TOPLESS to jasmonate signalling. *Nature* 464,  
682 788–791. doi:10.1038/nature08854.
- 683 Rasmussen, S., Barah, P., Suarez-Rodriguez, M. C., Bressendorff, S., Friis, P., Costantino, P., et  
684 al. (2013). Transcriptome Responses to Combinations of Stresses in Arabidopsis. *Plant*  
685 *Physiol.* 161, 1783–1794. doi:10.1104/pp.112.210773.
- 686 Rohilla, P., and Yadav, J. P. (2019). Acute salt stress differentially modulates nitrate reductase  
687 expression in contrasting salt responsive rice cultivars. *Protoplasma* 256, 1267–1278.  
688 doi:10.1007/s00709-019-01378-y.
- 689 Safi, A., Medici, A., Szponarski, W., Ruffel, S., Lacombe, B., and Krouk, G. (2017). The world  
690 according to GARP transcription factors. *Curr. Opin. Plant Biol.* 39, 159–167.  
691 doi:10.1016/j.pbi.2017.07.006.
- 692 Sawa, M., Nusinow, D. A., Kay, S. A., and Imaizumi, T. (2007). FKF1 and GIGANTEA  
693 Complex Formation Is Required for Day-Length Measurement in Arabidopsis. *Science*  
694 318, 261–265. doi:10.1126/science.1146994.
- 695 Sawaki, N., Tsujimoto, R., Shigyo, M., Konishi, M., Toki, S., Fujiwara, T., et al. (2013). A  
696 Nitrate-Inducible GARP Family Gene Encodes an Auto-Repressible Transcriptional  
697 Repressor in Rice. *Plant Cell Physiol.* 54, 506–517. doi:10.1093/pcp/pct007.



- 698 Schmid, M., Davison, T. S., Henz, S. R., Pape, U. J., Demar, M., Vingron, M., et al. (2005). A  
699 gene expression map of Arabidopsis thaliana development. *Nat Genet* 37, 501–6.  
700 doi:10.1038/ng1543.
- 701 Sepulveda-Garcia, E., and Rocha-Sosa, M. (2012). The Arabidopsis F-box protein AtFBS1  
702 interacts with 14-3-3 proteins. *Plant Sci* 195, 36–47. doi:10.1016/j.plantsci.2012.06.009.
- 703 Sheard, L. B., Tan, X., Mao, H., Withers, J., Ben-Nissan, G., Hinds, T. R., et al. (2010).  
704 Jasmonate perception by inositol-phosphate-potentiated COI1-JAZ co-receptor. *Nature*  
705 468, 400–5. doi:10.1038/nature09430.
- 706 Shyu, C., Figueroa, P., DePew, C. L., Cooke, T. F., Sheard, L. B., Moreno, J. E., et al. (2012).  
707 JAZ8 Lacks a Canonical Degron and Has an EAR Motif That Mediates Transcriptional  
708 Repression of Jasmonate Responses in Arabidopsis. *PLANT CELL ONLINE* 24, 536–550.  
709 doi:10.1105/tpc.111.093005.
- 710 Skaar, J. R., Pagan, J. K., and Pagano, M. (2013). Mechanisms and function of substrate  
711 recruitment by F-box proteins. *Nat. Rev. Mol. Cell Biol.* 14, 369–381.  
712 doi:10.1038/nrm3582.
- 713 Song, Y. H., Estrada, D. A., Johnson, R. S., Kim, S. K., Lee, S. Y., MacCoss, M. J., et al. (2014).  
714 Distinct roles of FKF1, GIGANTEA, and ZEITLUPE proteins in the regulation of  
715 CONSTANS stability in Arabidopsis photoperiodic flowering. *Proc Natl Acad Sci U S A*  
716 111, 17672–7. doi:10.1073/pnas.1415375111.
- 717 Spruck, C., Strohmaier, H., Watson, M., Smith, A. P. L., Ryan, A., Krek, W., et al. A CDK-  
718 Independent Function of Mammalian Cks1: Targeting of SCFSkp2 to the CDK Inhibitor  
719 p27Kip. *Mol. Cell*, 12.
- 720 Ueda, Y., Kiba, T., and Yanagisawa, S. (2020a). Nitrate-inducible NIGT1 proteins modulate  
721 phosphate uptake and starvation signalling via transcriptional regulation of *SPX* genes.  
722 *Plant J.* 102, 448–466. doi:10.1111/tpj.14637.
- 723 Ueda, Y., Nosaki, S., Sakuraba, Y., Miyakawa, T., Kiba, T., Tanokura, M., et al. (2020b).  
724 NIGT1 family proteins exhibit dual mode DNA recognition to regulate nutrient response-  
725 associated genes in Arabidopsis. *PLOS Genet.* 16, e1009197.  
726 doi:10.1371/journal.pgen.1009197.
- 727 Ueda, Y., and Yanagisawa, S. (2019). Perception, transduction, and integration of nitrogen and  
728 phosphorus nutritional signals in the transcriptional regulatory network in plants. *J. Exp.*  
729 *Bot.* 70, 3709–3717. doi:10.1093/jxb/erz148.
- 730 van Kleeff, P. J., Jaspert, N., Li, K. W., Rauch, S., Oecking, C., and de Boer, A. H. (2014).  
731 Higher order Arabidopsis 14-3-3 mutants show 14-3-3 involvement in primary root  
732 growth both under control and abiotic stress conditions. *J Exp Bot* 65, 5877–88.  
733 doi:10.1093/jxb/eru338.

- 734 Wang, L., Kim, J., and Somers, D. E. (2013). Transcriptional corepressor TOPLESS complexes  
735 with pseudoresponse regulator proteins and histone deacetylases to regulate circadian  
736 transcription. *Proc. Natl. Acad. Sci.* 110, 761–766. doi:10.1073/pnas.1215010110.
- 737 Wang, L., Xu, Q., Yu, H., Ma, H., Li, X., Yang, J., et al. (2020). Strigolactone and Karrikin  
738 Signaling Pathways Elicit Ubiquitination and Proteolysis of SMXL2 to Regulate  
739 Hypocotyl Elongation in *Arabidopsis thaliana*. *Plant Cell*, tpc.00140.2020.  
740 doi:10.1105/tpc.20.00140.
- 741 Wang, Z., Liu, P., Inuzuka, H., and Wei, W. (2014). Roles of F-box proteins in cancer. *Nat. Rev.*  
742 *Cancer* 14, 233–247. doi:10.1038/nrc3700.
- 743 Yanagisawa, S. (2013). Characterization of a nitrate-inducible transcriptional repressor NIGT1  
744 provides new insights into DNA recognition by the GARP family proteins. *Plant Signal.*  
745 *Behav.* 8, e24447. doi:10.4161/psb.24447.
- 746 Yasuhara, M. (2004). Identification of ASK and clock-associated proteins as molecular partners  
747 of LKP2 (LOV kelch protein 2) in *Arabidopsis*. *J. Exp. Bot.* 55, 2015–2027.  
748 doi:10.1093/jxb/erh226.
- 749 Zhang, G.-B., Meng, S., and Gong, J.-M. (2018). The Expected and Unexpected Roles of Nitrate  
750 Transporters in Plant Abiotic Stress Resistance and Their Regulation. *Int. J. Mol. Sci.* 19,  
751 3535. doi:10.3390/ijms19113535.
- 752 Zhou, H., Lin, H., Chen, S., Becker, K., Yang, Y., Zhao, J., et al. (2014). Inhibition of the  
753 *Arabidopsis* salt overly sensitive pathway by 14-3-3 proteins. *Plant Cell* 26, 1166–82.  
754 doi:10.1105/tpc.113.117069.
- 755 Zhu, D., Maier, A., Lee, J.-H., Laubinger, S., Saijo, Y., Wang, H., et al. (2008a). Biochemical  
756 Characterization of *Arabidopsis* Complexes Containing CONSTITUTIVELY  
757 PHOTOMORPHOGENIC1 and SUPPRESSOR OF PHYA Proteins in Light Control of  
758 Plant Development. *Plant Cell* 20, 2307–2323. doi:10.1105/tpc.107.056580.
- 759 Zhu, J., Jeong, J. C., Zhu, Y., Sokolchik, I., Miyazaki, S., Zhu, J.-K., et al. (2008b). Involvement  
760 of *Arabidopsis* HOS15 in histone deacetylation and cold tolerance. *Proc. Natl. Acad. Sci.*  
761 105, 4945–4950. doi:10.1073/pnas.0801029105.
- 762 Zoltowski, B. D., and Imaizumi, T. (2014). “Structure and Function of the ZTL/FKF1/LKP2  
763 Group Proteins in *Arabidopsis*,” in *The Enzymes* (Elsevier), 213–239. doi:10.1016/B978-  
764 0-12-801922-1.00009-9.

765  
766 **FIGURE LEGENDS**  
767

768 **Figure 1. The F-BOX STRESS INDUCED (FBS) protein family. (A)** Full-length protein  
769 sequence alignment of the four *Arabidopsis* FBS family members (FBS1 – FBS4) created with  
770 T-COFFEE sequence alignment program. Asterisks are fully conserved residues, colons are  
771 strongly conserved residue properties, and periods are weakly conserved residue properties. **(B)**

772 FBS family interactions with ASK1 in yeast two-hybrid assays. Diploid yeast strains with  
773 indicated test constructs as bait (DBD) and prey (AD) were grown in liquid culture, diluted  
774 ( $OD_{600} = 10^0, 10^{-1}, 10^{-2}, 10^{-3}$ ), and spotted on SD medium minus Trp/Leu (-TL), minus  
775 Trp/Leu/His (-TLH), and minus Trp/Leu/His/Ade (-TLHA).

776  
777 **Figure 2. FBS INTERACTING PROTEIN (FBIP) sequence features.** Full-length protein  
778 sequence alignment of the two Arabidopsis FBIP family members created with T-COFFEE  
779 sequence alignment program. Blue indicates locations of seven WD40-like repeat sequences  
780 predicted by the WD40-repeat protein Structure Predictor version 2.0 (WDSPdb 2.0). Asterisks  
781 are fully conserved residues, colons are strongly conserved residue properties, and periods are  
782 weakly conserved residue properties.

783  
784 **Figure 3. Yeast two-hybrid (Y2H) interactions between FBS1 and FBIP proteins. (A)** Full-  
785 length FBS1 interactions with full-length FBIP1 and FBIP2. Diploid yeast strains with indicated  
786 test constructs as bait (DBD) and prey (AD) were grown in liquid culture, diluted ( $OD_{600} = 10^0,$   
787  $10^{-1}, 10^{-2}, 10^{-3}$ ), and spotted on SD medium minus Trp/Leu (-TL), minus Trp/Leu/His (-TLH),  
788 and minus Trp/Leu/His/Ade (-TLHA). **(B)** Truncated FBS1 bait (DBD) construct interaction  
789 with full length FBIP1 prey (AD). Amino acid deletions are indicated on left.

790  
791 **Figure 4. Bimolecular fluorescence complementation (BiFC) interactions between FBS1**  
792 **and FBIP proteins.** Laser-scanning confocal microscopy of *N. benthamiana* epidermal cells  
793 expressing N-terminal nYFP- or cYFP-tagged FBS1 and FBIP proteins. FBS1 interactions with  
794 FBIP1 (top row) or FBIP2 (bottom row) are visualized on BiFC yellow channel (YFP, left  
795 column). A co-expressed H2B-RFP (as nuclear marker) is visualized on red channel (RFP,  
796 middle column) and YFP/RFP images are overlaid (Merge, right column). Arrow indicates  
797 selected nuclei in expanded inset image. Scale bar = 100  $\mu$ m

798  
799 **Figure 5. FBS1 influence on FBIP1 protein abundance in plants.** *N. benthamiana* leaves were  
800 infiltrated with *Agrobacterium* (C58C1) strains to express tagged proteins. *Agrobacterium* mixes  
801 contained varying cell densities of strains harboring expression constructs (myc-FBS1 and/or  
802 FBIP1-HA), a suppressor protein (p19), or untransformed cells. Total protein was isolated from  
803 leaves three days after infiltration, separated by SDS-PAGE, transferred, and probed with  
804 antibodies against myc (top row, FBS1) or HA (second row, FBIP1). Bottom two rows show  
805 Ponceau S staining of the major subunit of Rubisco from the same two blots as a loading control.

806  
807 **Figure 6. FBIP interactions with transcriptional repressor NIGT1.1. (A)** Interaction between  
808 full-length FBIP1 and full-length NIGT1.1 in yeast two-hybrid assays. Diploid yeast strains with  
809 indicated test constructs as bait (DBD) and prey (AD) were grown in liquid culture, diluted  
810 ( $OD_{600} = 10^0, 10^{-1}, 10^{-2}, 10^{-3}$ ), and spotted on SD medium minus Trp/Leu (-TL), minus  
811 Trp/Leu/His (-TLH), and minus Trp/Leu/His/Ade (-TLHA). **(B)** Laser-scanning confocal  
812 microscopy of *N. benthamiana* epidermal cells expressing N-terminal nYFP- or cYFP-tagged  
813 FBIP and NIGT1.1 proteins. NIGT1.1 interactions with FBIP1 (top row) or FBIP2 (bottom row)  
814 are visualized on BiFC yellow channel (YFP), left column). A co-expressed H2B-RFP (as  
815 nuclear marker) is visualized on red channel (RFP, middle column) and YFP/RFP images are  
816 overlaid (Merge, right column). Arrow indicates selected nuclei in expanded inset image. Scale  
817 bar = 100  $\mu$ m

818  
819  
820  
821  
822  
823  
824  
825  
826  
827  
828  
829  
830  
831  
832  
833  
834  
835  
836  
837  
838  
839  
840  
841  
842  
843  
844  
845  
846  
847  
848  
849  
850  
851  
852  
853  
854  
855  
856  
857  
858  
859  
860  
861  
862  
863

**Figure 7. Integration of FBS proteins in a plant stress network.**

(A) Stress regulates FBS function through *FBSI* gene induction and possible control imposed by 14-3-3 proteins, which are negative regulators of abiotic stress responses. (B) SCF<sup>FBS</sup> complexes ubiquitylate (Ub) FBIP through FBS N-terminal (NT) interactions and also target an unknown protein by FBS C-terminal (CT) interactions. Targets are degraded by the 26S proteasome leading to cellular changes under stress conditions. (C) NIGT1.1 dimerizes with other NIGT1 transcription factors and binds promoter regions of nitrate responsive genes. FBIP interacts NIGT1.1, and possibly with other NIGT1 and GARP-type transcription factors to influence their activity. Action by FBIP might influence in vivo dimerization, recruit additional gene regulation factors, alter DNA binding, or carry out some other function.



882 **Figure 2**  
883

**FBIP1** -MEGRRITASPRPCSG--RRIVAKKRSRPDGFVNSVKKLQRREISSRKDRA  
**FBIP2** MMEGRRIIANPRPCSGSRRVIAKKRSRPDGFVNSVKKLQRREISSRMDRA  
\*\*\*\*\* \*\_\*\*\*\*\* \*\*:;\*\*\*\*\* \*\*

**FBIP1** FSISTAQERFRNMRLVEQYDTHDPKGHCLVALPFLMKRTKVIEIVAARDI  
**FBIP2** FSISTAQERFRNMRLVEQYDTHDPKGYCLVSLPNLLKRSKVIEIVAARDI  
\*\*\*\*\*:\*\*\*\*\*:\*\*\*\*\*:\*\*\*:\* \*\*;\*:\*\*\*:\*\*\*\*\*

**FBIP1** VFALAHSGVCAAFSRESNKRICFLNVPDEVIRSLFYKNKNDLITVSVY  
**FBIP2** VFALTLSGVCASFSEETNKKVCFNVPDEVIRSLFYKNKNDLITVSVY  
\*\*\*\*\*:\*\*\*\*\*:\*\*\*\*\*:\*\*\*:;\*\*\*\*\*

**FBIP1** ASDNFSSLKCRSTRIEYILRGQPDAGFALFESESLKWPGFVEFDDVNGKV  
**FBIP2** ASDNYSSLKCRSTRIEYILRGQADAGPLFESESLKWPGFVEFDDVNGKV  
\*\*\*\*\*:\*\*\*\*\*:\*\*\*\*\*:\*\*\*\*\_\* \*\*\*\*\*

**FBIP1** LTYSAQDSVYKVFDLKNYTMLYSISDKNVQEIKISPGIMLLIFKRAASHV  
**FBIP2** LTYSAQDSVYKVFDLKNYALLYSISDKNVQEIKISPGIMLLIFKRAASHV  
\*\*\*\*\*:\*\*\*\*\*:;\*\*\*\*\*

**FBIP1** PLKILSIEDGTVLKSFNHLHRNKKVDFIEQFNEKLLVKQENENLQILDV  
**FBIP2** PLKILSIEDGTLKSFHLLHRNKKVDFIEQFNEKLLVKQENENLQILDV  
\*\*\*\*\*:\*\*\*:\*\*\*\*\*

**FBIP1** RNAELMEVSRAEFMTPSAFIFLYENQLFLFRNRNVSVWNFRGELVTSFE  
**FBIP2** RNAELIEVSRDFMTPSAFIFLYENQLFLFRNRNVSVWNFRGELVTSFE  
\*\*\*\*\*:\*\*\*:;\*\*\*\*\*

**FBIP1** DHLWHPDCNTNNIYITSDQDLIISYCKADTEDQWIEGNAGSINISNILT  
**FBIP2** DHLWHPDCNTNNIYITSDQDLIISYCKADTEDQWIEGNAGSINISNILT  
\*\*\*\*\*

**FBIP1** GKCLAKITPSSGPPKDESSSNCMGKNSKQRRNAVAEAELEDITALFYDE  
**FBIP2** GKCLAKIKANNPPKEEDCSSSDL-G-NSSRRRSVAEAELEDITALFYDE  
\*\*\*\*\*.....\*\*\*\*\*:;.\*\*\*: \* \*\_\*:\*\*\_\* \*\*\*\*\*

**FBIP1** ERNEIYTGNRHGLVHVWSN  
**FBIP2** ERNEIYTGNRHGLLHVWSN  
\*\*\*\*\*:\*\*\*\*\*

884  
885  
886  
887  
888  
889  
890  
891  
892  
893  
894  
895  
896  
897  
898  
899  
900  
901  
902



903 **Figure 3**  
904

(A)

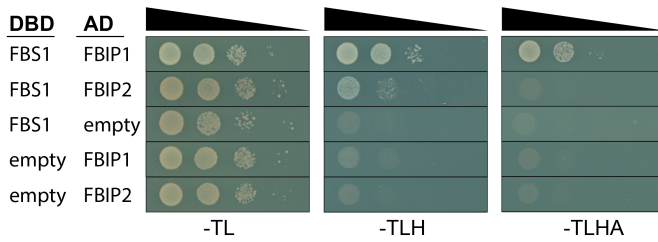

(B)

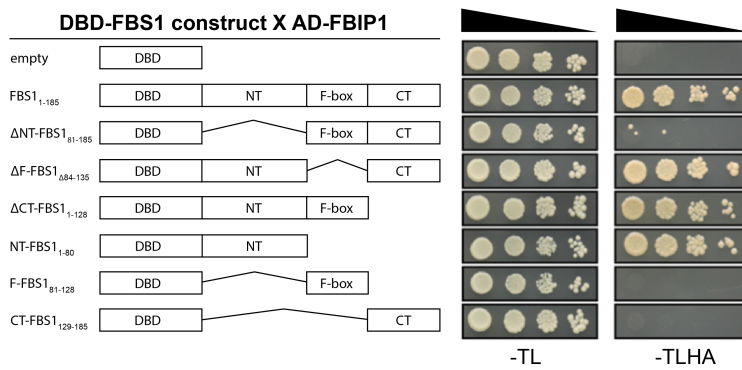

905  
906  
907  
908  
909  
910  
911  
912  
913  
914  
915  
916  
917  
918  
919  
920  
921  
922  
923  
924  
925  
926  
927

928 **Figure 4**  
929

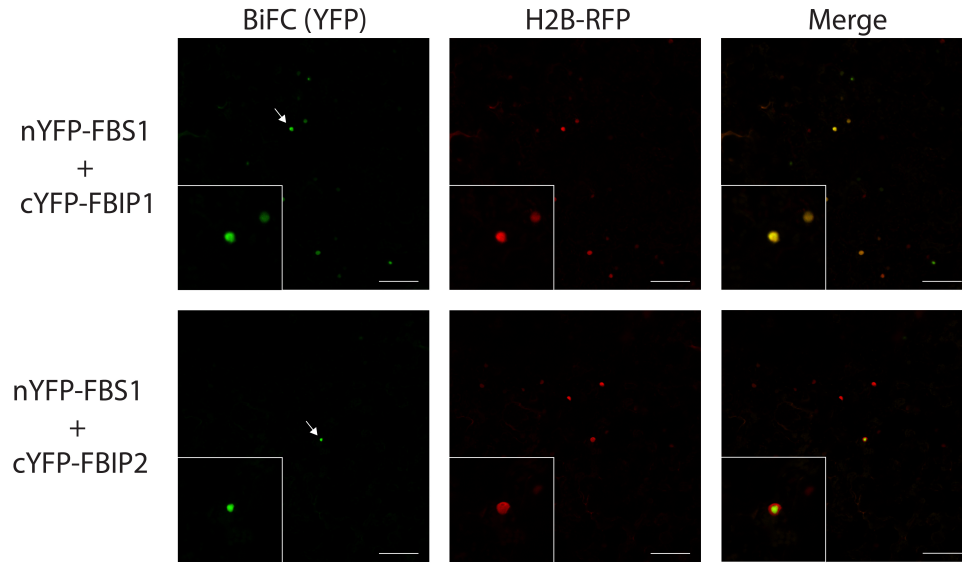

930  
931  
932  
933  
934  
935  
936  
937  
938  
939  
940  
941  
942  
943  
944  
945  
946  
947  
948  
949  
950  
951  
952  
953  
954  
955  
956  
957  
958  
959

960 **Figure 5**  
961

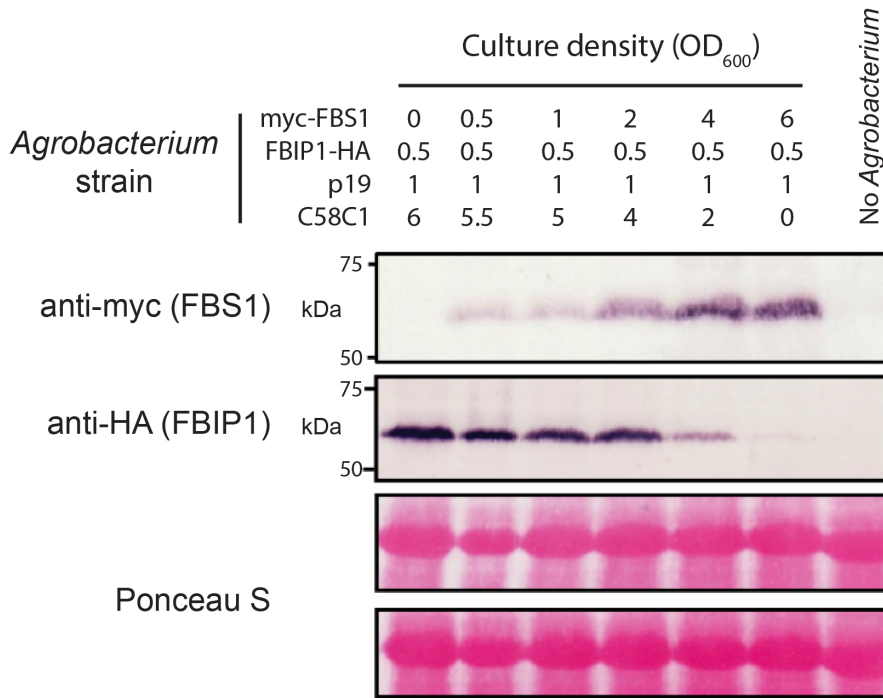

962  
963  
964  
965  
966  
967  
968  
969  
970  
971  
972  
973  
974  
975  
976  
977  
978  
979  
980  
981  
982  
983  
984  
985  
986  
987

988 **Figure 6**  
989

(A)

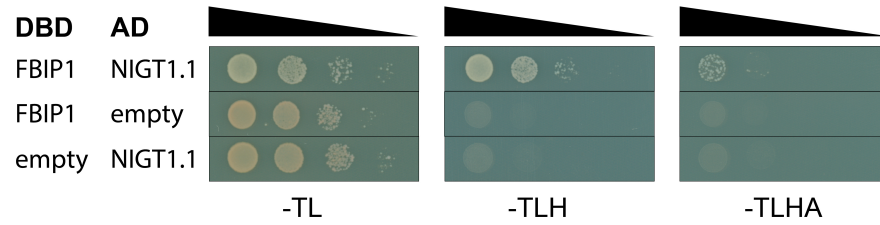

(B)

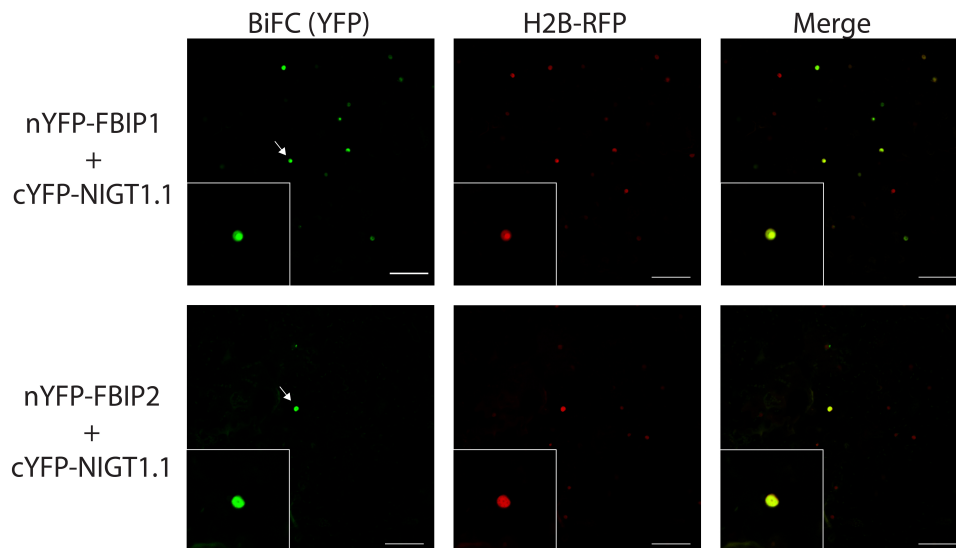

990  
991  
992  
993  
994  
995  
996  
997  
998  
999  
1000  
1001  
1002  
1003  
1004  
1005  
1006

1007 **Figure 7**  
1008

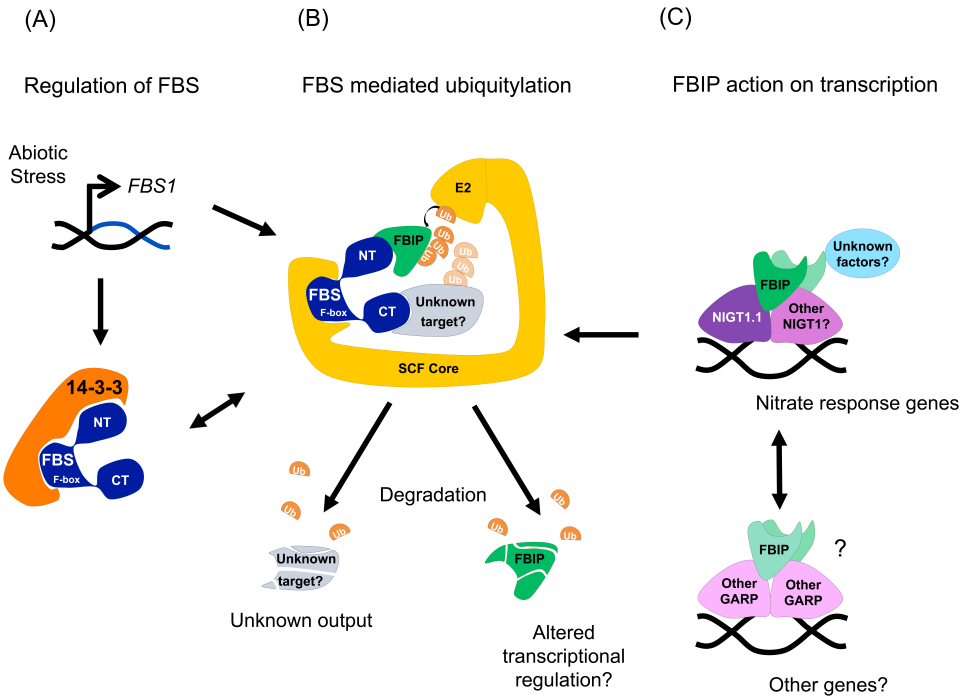

1009  
1010  
1011  
1012  
1013  
1014  
1015  
1016  
1017  
1018  
1019  
1020  
1021  
1022  
1023  
1024  
1025  
1026
